# Supplementary material
Source: publisher site journal article supplement (https://www.spandidos-publications.com/8522/downloadSupplementary)

Figure S1. Representative HBAD-mRFP-GFP-LC3 transfection images. Fluorescence images showing successful reporter expression 24 h after transfection. Scale bar, 20  $\mu$ m.

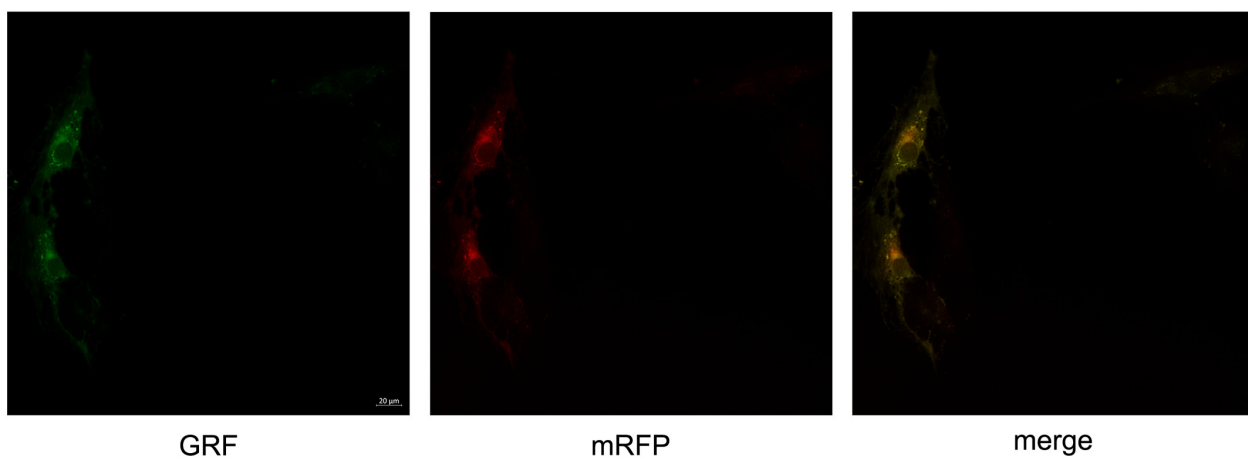

Figure S2. Histopathological examination of major organs in CON, OVX and BA groups (H&E staining; scale bar, 100  $\mu$ m). Representative sections of heart, lung, liver, and kidney are shown. OVX, ovariectomized; BA, betulinic acid.

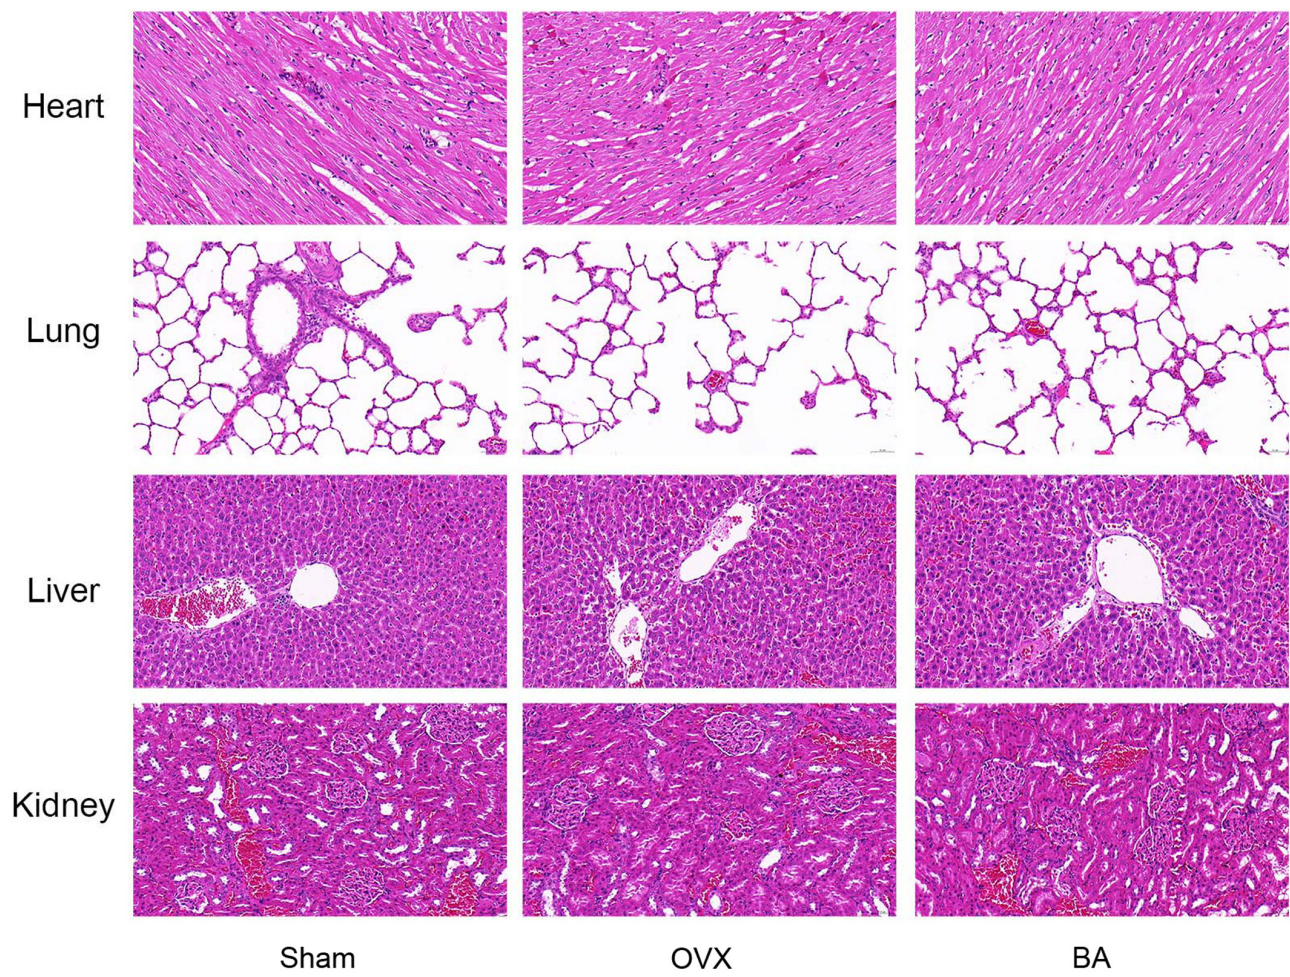

Figure S3. Assessment of autophagic flux via mRFP-GFP-LC3 puncta assay under different treatment conditions. (A) Laser confocal microscopy images showing GFP-LC3 (green), mRFP-LC3 (red), and merged puncta in cells. (B) Quantitative analysis of autophagosomes (yellow puncta) and autolysosomes (red puncta) per cell across treatment groups. Data are expressed as the mean  $\pm$  SEM. ##P<0.01 vs. corresponding H<sub>2</sub>O<sub>2</sub> group; &P<0.05 and &&P<0.01 vs. corresponding H<sub>2</sub>O<sub>2</sub> + BA group. BA, betulinic acid; N.S., not significant.

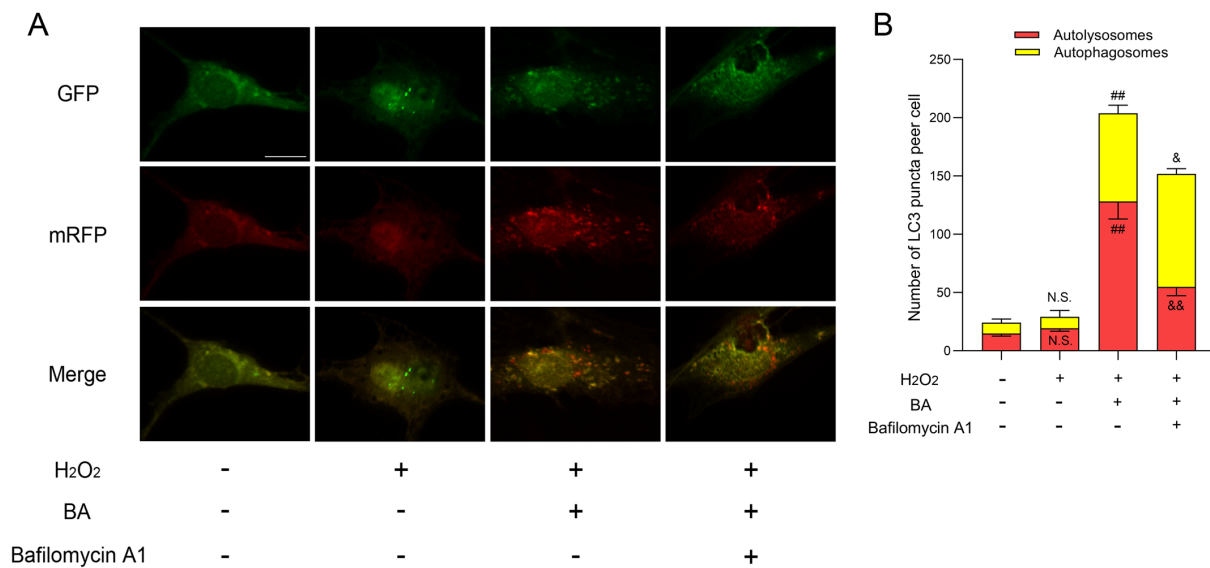

Supplement: Supplementary file 1 [file downloadSupplementary]
